# Supplementary material
Source: PubMed Central journal article supplement (PMC2941330)
Supplement: 1011105107_pnas.201011105SI.pdf [file 1011105107_pnas.201011105SI.pdf]

# Supporting Information

Diaz et al. 10.1073/pnas.1011105107

## SI Experimental Procedures

For fatty acid (FA) analysis, total fatty acids from 10 optical densities at 600 nm (OD<sub>600</sub>) of yeast were extracted and were converted to methyl esters as described (1). FA species were

separated according to chain length and degree of saturation by gas-liquid chromatography and were identified by retention time. The molar amount of each species was measured by using flame ionization detector (1).

1. Miyazaki M, Kim HJ, Man WC, Ntambi JM (2001) Oleoyl-CoA is the major de novo product of stearoyl-CoA desaturase 1 gene isoform and substrate for the biosynthesis of the Harderian gland 1-alkyl-2,3-diaclyglycerol. *J Biol Chem* 276:39455–39461.

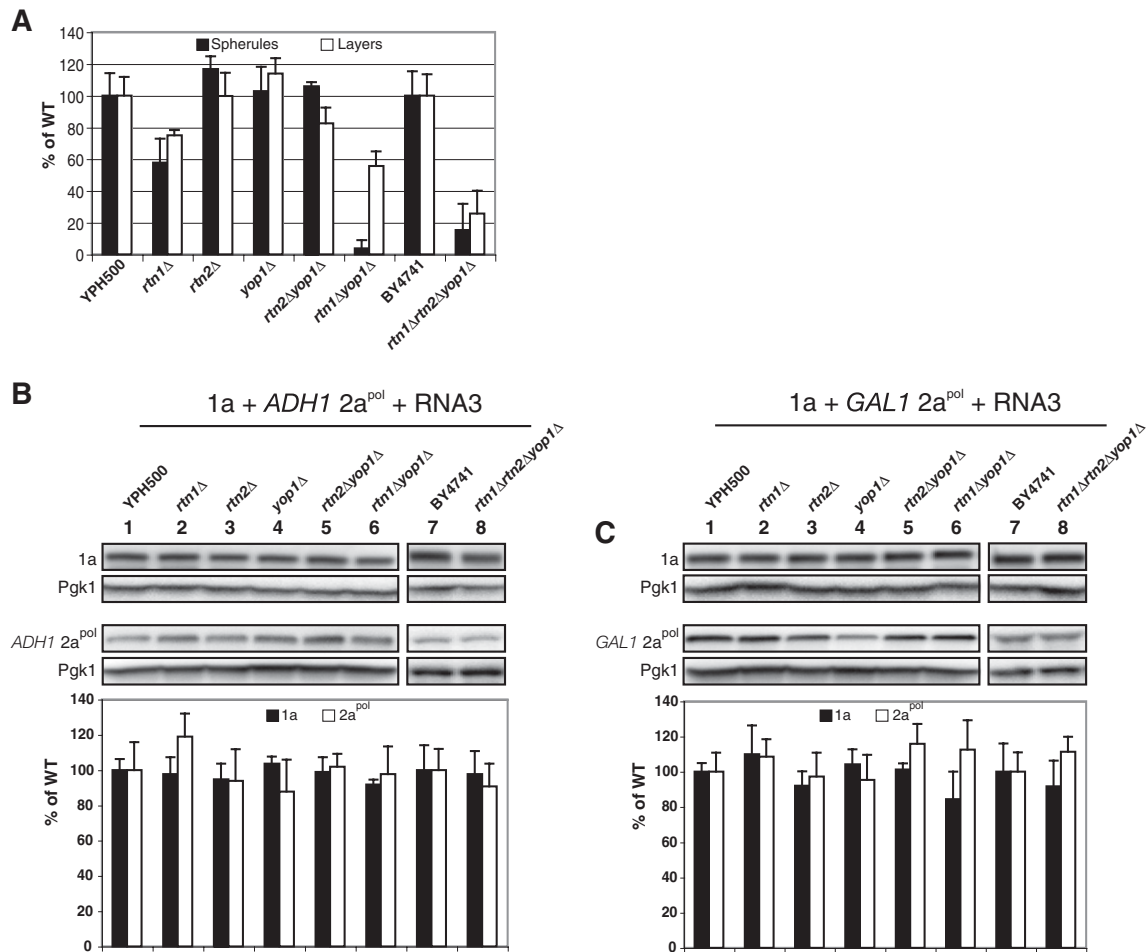

**Fig. S1.** BMV 1a and 2a levels remain constant in absence of RHPs, whereas negative-strand RNA synthesis is inhibited. (A) Detection of negative-strand BMV RNA synthesis in yeast coexpressing 1a, RNA3, and either *ADH1* 2a<sup>pol</sup> (spherules) or *GAL1* 2a<sup>pol</sup> (layers). Total RNA extracts were obtained from wt YPH500 yeast (lane 1), *rtn1*Δ (lane 2), *rtn2*Δ (lane 3), *yop1*Δ (lane 4), *rtn2*Δ*yop1*Δ (lane 5), *rtn1*Δ*yop1*Δ (lane 6), wt BY4741 (lane 7), or *rtn1*Δ*rtn2*Δ*yop1*Δ (lane 8) yeast expressing indicated BMV components. Accumulation of negative-strand subgenomic RNA4 was detected by Northern blotting using probes specific to BMV RNAs. Equal loading of total RNA was verified by probing for 18S ribosomal RNA. Accumulation of BMV 1a and *ADH1* 2a<sup>pol</sup> (B) or *GAL1* 2a<sup>pol</sup> (C) in wt, single-, double- or triple-deletion yeast cells was measured by Western blot analysis. Total proteins were extracted from equal numbers of yeast cells and analyzed by SDS/PAGE. Equal loading of total protein was verified by measuring Pgk1p levels. All values represent the mean of at least three independent experiments.

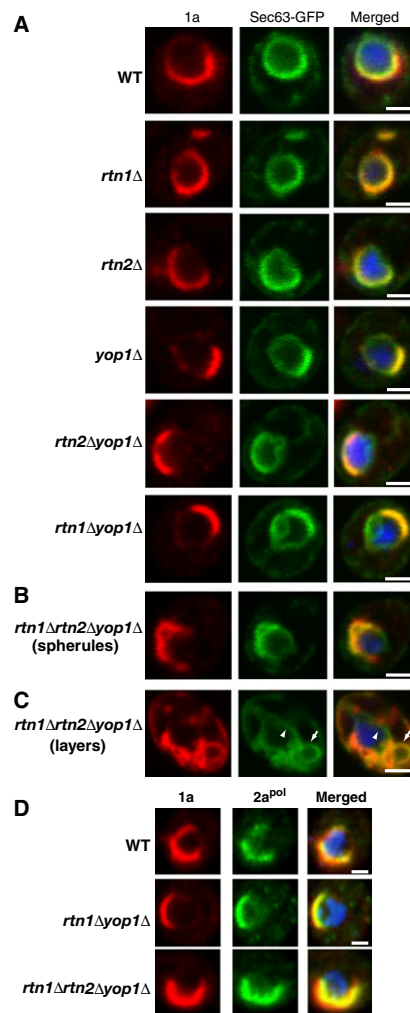

**Fig. S2.** BMV 1a retains ER membrane localization in reticulon deletion strains. (A) Confocal fluorescence images of wt, single-, and double-deletion mutant yeast cells coexpressing the ER marker Sec63-GFP and 1a plus  $2a^{pol}$ . Representative images for 1a (Left; red), Sec63-GFP (Center; green), and merged signals (Right) are shown. DNA was stained with DAPI (blue). (B)  $rtn1\Delta rtn2\Delta yop1\Delta$  yeast cells coexpressing the ER marker Sec63-GFP and 1a plus *ADH1*  $2a^{pol}$  (spherules). (C)  $rtn1\Delta rtn2\Delta yop1\Delta$  yeast cells coexpressing the ER marker Sec63-GFP and 1a plus *GAL1*  $2a^{pol}$  (layers). Arrowhead indicates nuclear membrane, whereas arrow points out 1a signal extending away from the nuclear membrane. (D) Localization of  $2a^{pol}$  in WT,  $rtn1\Delta$ , or  $rtn1\Delta yop1\Delta$  yeast. Representative images for 1a (Left; red),  $2a^{pol}$  (Center; green), and merged signals (Right) are shown. DNA was stained with DAPI (blue). (Scale bars: 2  $\mu$ m.)





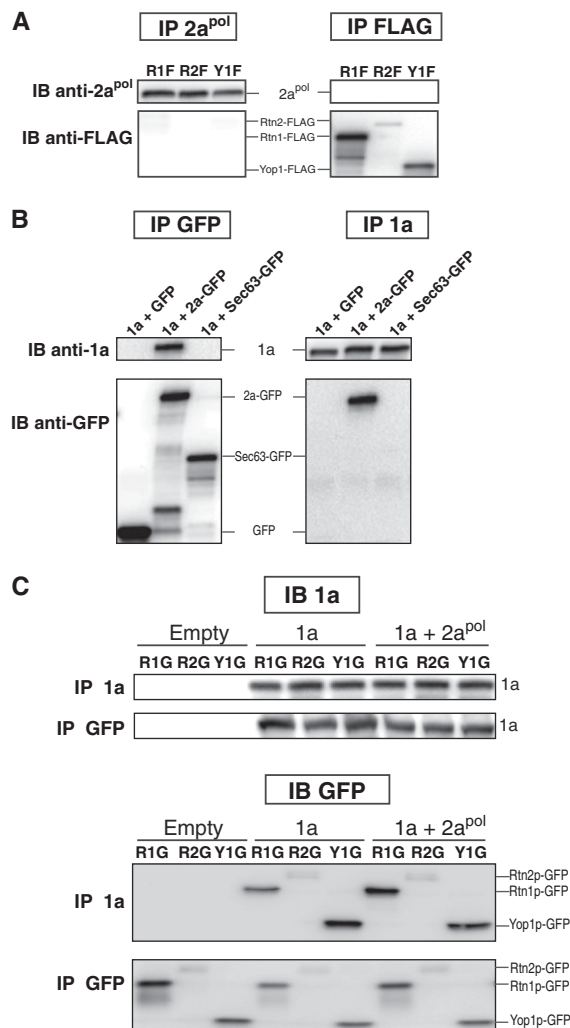

**Fig. S6.** The 1a-RHP interaction is specific. (A) Yeast were transformed with plasmids encoding the FLAG-tagged RHPs and *GAL1* 2a<sup>pol</sup>. Cells were lysed, and the cleared lysates were subjected to immunoprecipitation by using anti-2a or anti-FLAG antibodies (IP 2a and IP FLAG, respectively). The resulting immunoprecipitates were analyzed on 4–15% SDS/PAGE and immunoblotted by using anti-2a or anti-FLAG antibodies. The positions of 2a, Rtn1p-FLAG, Rtn2p-FLAG, and Yop1p-FLAG are shown. (B) Control experiment to rule out membrane-dependence of 1a-RHP interaction. Wt yeast expressing free GFP, 2a<sup>pol</sup>-GFP, or Sec63p-GFP and BMV 1a were lysed, and cleared lysates were subjected to immunoprecipitation by using anti-1a or anti-GFP antibodies (IP 1a and IP GFP). Reactions were analyzed on 4–15% SDS/PAGE and immunoblotted by using anti-1a or anti-GFP antibodies. (C) Wt yeast or yeast cells expressing Rtn1p-GFP, Rtn2p-GFP, or Yop1p-GFP from their endogenous promoters and chromosomal loci were transformed with empty plasmids, BMV 1a alone, or 1a plus *GAL1* 2a<sup>pol</sup> (layers). Yeast cells were processed as described above. The resulting immunoprecipitates were analyzed by SDS/PAGE and immunoblotted by using anti-1a or anti-GFP antibodies. The positions of 1a, Rtn1p-GFP, Rtn2p-GFP, Yop1p-GFP, and GFP are shown on the right.
